# Supplementary material
Source: PubMed Central journal article supplement (PMC6518341)
Supplement: jama-321-1780-s002.pdf [file jama-321-1780-s002.pdf]

## Supplementary Online Content

Adelman JS, Applebaum JR, Schechter CB, et al. Effect of restriction of the number of concurrently open records in an electronic health record on wrong-patient order errors: a randomized clinical trial. *JAMA*. doi:10.1001/jama.2019.3698

**eMethods 1.** Retract-and-Reorder Methodology

**eFigure 1.** Wrong-Patient Retract-and-Reorder Measure

**eFigure 2.** Primary Results Comparing Wrong-Patient Order Sessions in the Restricted vs Unrestricted Group (As-Treated Analysis)

**eTable 1.** Order Characteristics

**eTable 2.** Wrong-Patient Orders in the Restricted vs Unrestricted Group (As-Randomized Analysis)

**eTable 3.** Baseline Clinician Characteristics (As-Treated Analysis)

**eTable 4.** Wrong-Patient Orders in the Restricted vs Unrestricted Group (As-Treated Analysis)

**eTable 5.** Utilization and Wrong-Patient Orders by Number of Records Open in the Unrestricted Group

**eReferences**

This supplementary material has been provided by the authors to give readers additional information about their work.

## eMethods 1. Retract-and-Reorder Methodology

The Retract-and-Reorder methodology is based on the premise that the majority of orders placed and then cancelled by the same clinician represent an order error, and that the subsequent action taken by the clinician is indicative of the type of error.<sup>1</sup> The Wrong-Patient Retract-and-Reorder (RAR) measure was the first Health Information Technology (IT)

Safety measure endorsed by National Quality Forum (NQF Measure #2723).<sup>2,3</sup> The measure detects RAR events, defined as one or more orders placed for a patient that are retracted within 10 minutes, and then placed by the same clinician for a different patient within the next 10 minutes (eFigure 1). In a validation study, real-time confirmatory telephone interviews with clinicians who placed and retracted orders demonstrated that the RAR measure correctly identified near-miss, wrong-patient orders in 170 of 223 cases, yielding a positive predictive value of 76.2% (95% CI 70.6% to 81.9%).<sup>4</sup> Extending the interval beyond 10 minutes revealed few additional RAR events. The mean time from placing the initial order for the wrong patient to retraction was 1 minute, 18 seconds, and the mean time from retraction to placing the order for the correct patient was 2 minutes, 17 seconds.

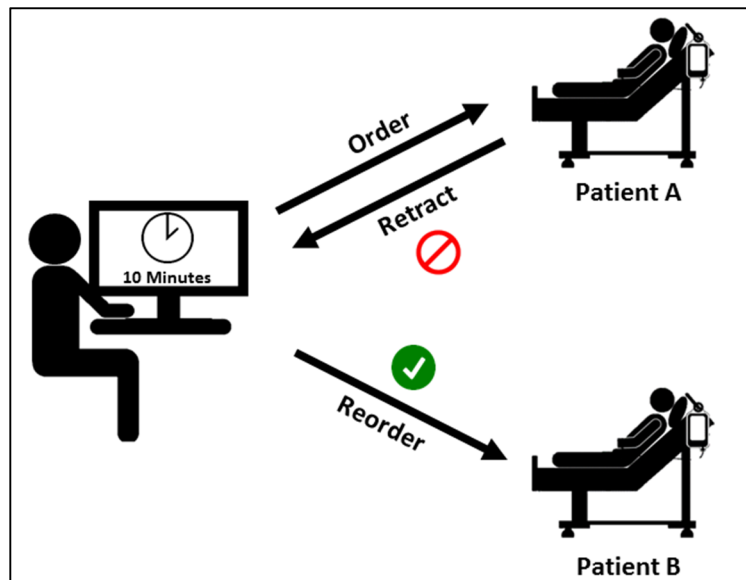

eFigure 1. Wrong-Patient Retract-and-Reorder Measure.

In the initial epidemiological study, the measure identified 5246 orders placed on the wrong patient over a 1-year period in a large academic medical center, which translates to 58 wrong-patient orders per 100 000 orders.<sup>4</sup> This volume of near-miss, wrong-patient orders is vastly greater than estimates reported in studies using voluntarily reported errors as the outcome,<sup>5-7</sup> enabling researchers to test interventions to prevent these errors in a range of systems and settings. Subsequently, the measure has been used to test the effectiveness of several systems-level interventions to reduce the frequency of wrong-patient order errors.<sup>8-12</sup>

### Near-Miss Errors for Patient Safety Surveillance and Research

The Retract-and-Reorder automated detection method identifies near-miss errors rather than errors that reach the patient and cause harm. Near-miss errors are also referred to as “close calls” by the Department of Veterans Affairs,<sup>13</sup> “good catches” by the National Association for Healthcare Quality,<sup>14</sup> and “free lessons” by the safety expert James Reason.<sup>15</sup> Near-miss errors are particularly valuable in patient safety research, as they have been shown to occur up to 100 times more frequently than errors that reach the patient and cause harm, and thus can provide a sufficient number of outcome events to power research studies evaluating the effect of safety interventions.<sup>16</sup>

The Agency for Healthcare Research and Quality (AHRQ) National Resource Center for Health Information Technology developed the **Health IT Evaluation Toolkit**, and identifies near-miss errors as a useful outcome measure for the evaluation of the effectiveness and safety of Health IT interventions.<sup>17</sup> AHRQ has coordinated the development and maintenance of the “Common Formats” for national reporting of patient safety events to Patient Safety

Organizations, and has included near-miss errors as important patient safety data to be collected and analyzed.<sup>18</sup>

The use of near-miss errors to test safety improvements in healthcare is encouraged by every major organization dedicated to improving patient safety including AHRQ, Institute of Medicine, World Health Organization, Institute for Healthcare Improvement, and The Joint Commission,<sup>16,19-22</sup> because they have been shown by safety experts to have the same causal pathway as errors that cause harm. The key distinction between an adverse event and a near-miss error is that in the latter a human recovery occurs before the error reaches the patient and causes harm. This principle is the foundation for the RAR automated detection method.

**eFigure 2. Primary Results Comparing Wrong-Patient Order Sessions in the Restricted vs Unrestricted Group (As-Treated Analysis)**

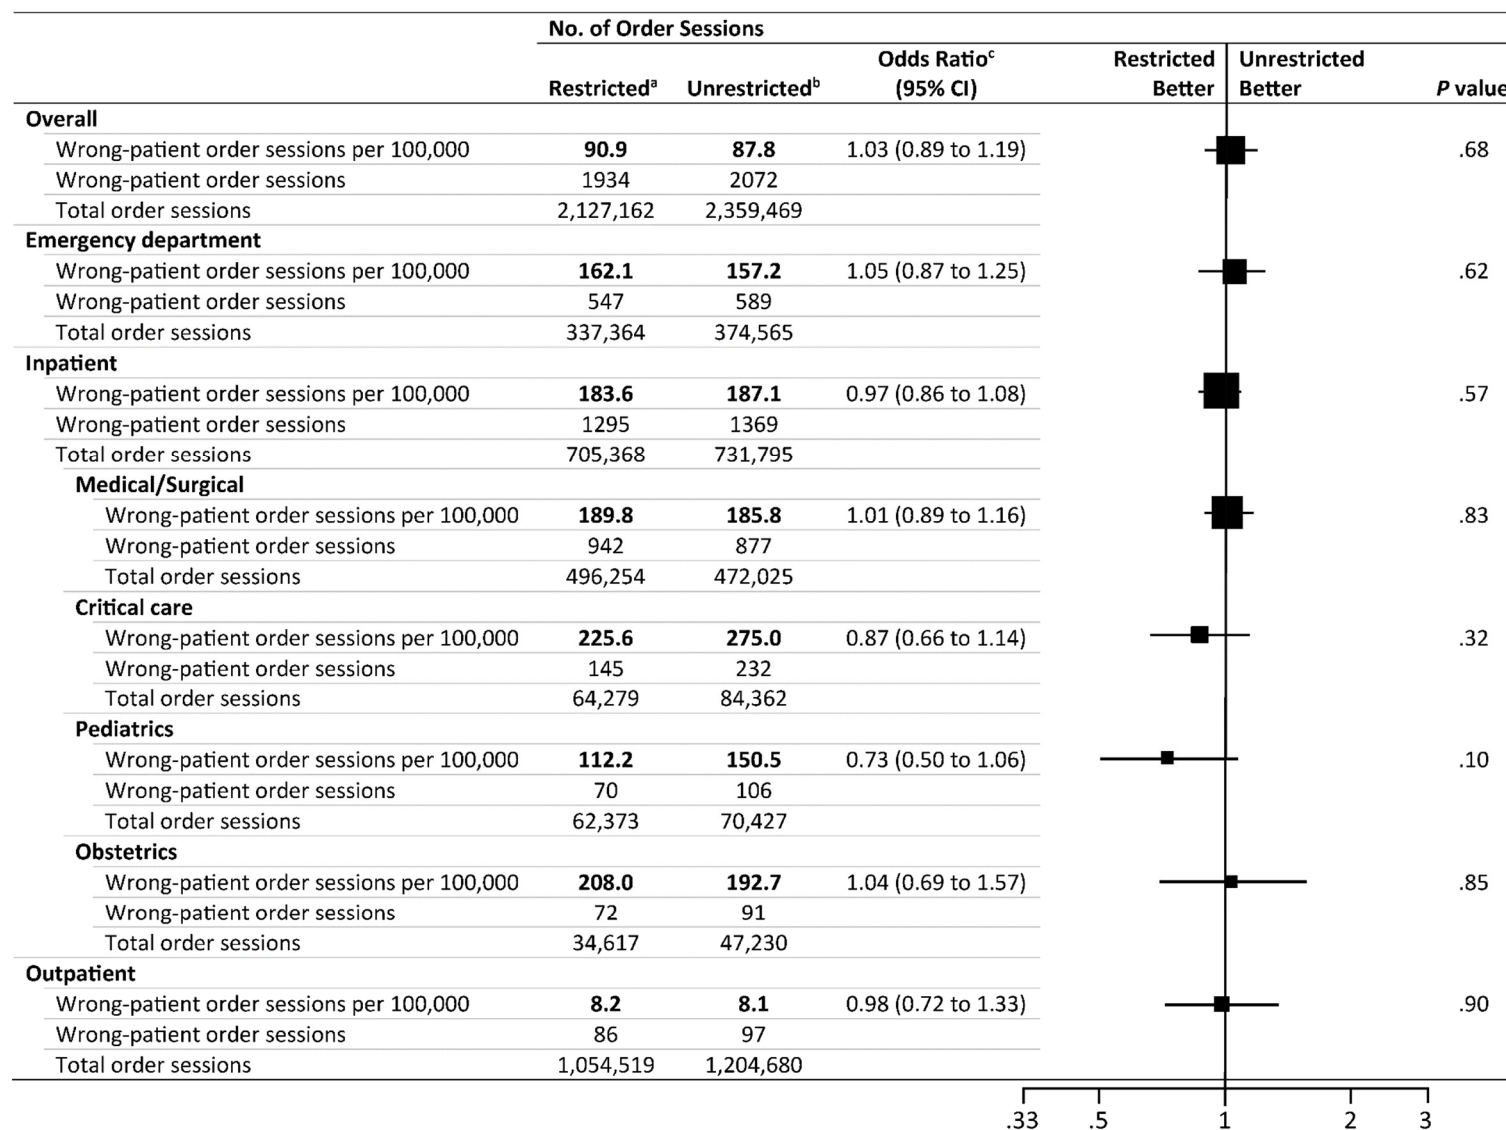

<sup>a</sup> Restricted, configuration limited to one record open at a time.

<sup>b</sup> Unrestricted, configuration allowed up to four records open concurrently.

<sup>c</sup> Random-effects logistic regression models were constructed, using the order session as the unit of analysis and the clinician as the random intercept. The order session, a series of orders placed consecutively by a single clinician for a single patient, represents an independent opportunity for an error to occur. Wrong-patient order sessions were defined as order sessions that included at least one wrong-patient Retract-and-Reorder event. In as-treated analysis, each order was characterized according to the clinician's configuration at the time the order was placed.

**eTable 1. Order Characteristics**

| <b>Characteristic</b> | <b>No. (%) of Orders</b>      |                                 |
|-----------------------|-------------------------------|---------------------------------|
|                       | <b>Restricted<sup>a</sup></b> | <b>Unrestricted<sup>b</sup></b> |
| <b>Total orders</b>   | 5,856,992                     | 6,283,306                       |
| Order Type            |                               |                                 |
| Medications           | 2,630,170 (44.9)              | 2,888,009 (46.0)                |
| Labs                  | 1,836,048 (31.4)              | 1,911,116 (30.4)                |
| Imaging               | 253,922 (4.3)                 | 253,732 (4.0)                   |
| Other                 | 1,136,852 (19.4)              | 1,230,449 (19.6)                |

<sup>a</sup> Restricted, configuration limited to one record open at a time.

<sup>b</sup> Unrestricted, configuration allowed up to four records open concurrently.

**eTable 2. Wrong-Patient Orders in the Restricted vs Unrestricted Group (As-Randomized Analysis)<sup>a</sup>**

|                                  | No. of Orders           |                           |
|----------------------------------|-------------------------|---------------------------|
|                                  | Restricted <sup>b</sup> | Unrestricted <sup>c</sup> |
| <b>Overall</b>                   |                         |                           |
| Wrong-patient orders per 100,000 | <b>52.2</b>             | <b>48.0</b>               |
| Wrong-patient orders             | 3058                    | 3015                      |
| Total orders                     | 5,856,992               | 6,283,306                 |
| <b>Emergency department</b>      |                         |                           |
| Wrong-patient orders per 100,000 | <b>88.6</b>             | <b>86.0</b>               |
| Wrong-patient orders             | 980                     | 978                       |
| Total orders                     | 1,106,168               | 1,137,774                 |
| <b>Inpatient</b>                 |                         |                           |
| Wrong-patient orders per 100,000 | <b>89.5</b>             | <b>86.7</b>               |
| Wrong-patient orders             | 1940                    | 1896                      |
| Total orders                     | 2,166,764               | 2,186,305                 |
| <b>Medical/Surgical</b>          |                         |                           |
| Wrong-patient orders per 100,000 | <b>91.6</b>             | <b>87.5</b>               |
| Wrong-patient orders             | 1387                    | 1228                      |
| Total orders                     | 1,513,368               | 1,403,712                 |
| <b>Critical care</b>             |                         |                           |
| Wrong-patient orders per 100,000 | <b>117.7</b>            | <b>120.8</b>              |
| Wrong-patient orders             | 215                     | 301                       |
| Total orders                     | 182,698                 | 249,252                   |
| <b>Pediatrics</b>                |                         |                           |
| Wrong-patient orders per 100,000 | <b>54.4</b>             | <b>58.6</b>               |
| Wrong-patient orders             | 96                      | 143                       |
| Total orders                     | 176,601                 | 243,890                   |
| <b>Obstetrics</b>                |                         |                           |
| Wrong-patient orders per 100,000 | <b>103.1</b>            | <b>115.3</b>              |
| Wrong-patient orders             | 143                     | 149                       |
| Total orders                     | 138,681                 | 129,270                   |
| <b>Outpatient</b>                |                         |                           |
| Wrong-patient orders per 100,000 | <b>4.8</b>              | <b>4.5</b>                |
| Wrong-patient orders             | 119                     | 128                       |
| Total orders                     | 2,493,182               | 2,820,934                 |

<sup>a</sup> Wrong-patient orders were analyzed using the order as the unit of analysis, with analysis conducted according to clinicians' assigned randomization group (as-randomized analysis).

<sup>b</sup> Restricted, configuration limited to one record open at a time.

<sup>c</sup> Unrestricted, configuration allowed up to four records open concurrently.

**eTable 3. Baseline Clinician Characteristics (As-Treated Analysis)<sup>a</sup>**

| Characteristic                         | No. (%) of Clinicians                 |                                         |                                 |
|----------------------------------------|---------------------------------------|-----------------------------------------|---------------------------------|
|                                        | Restricted <sup>b</sup><br>(n = 1520) | Unrestricted <sup>c</sup><br>(n = 1741) | Varied <sup>d</sup><br>(n = 95) |
| Age, mean (SD), y                      | 42.9 (12.7)                           | 43.4 (12.4)                             | 41.2 (10.5)                     |
| Experience at study site, mean (SD), y | 6.5 (6.0)                             | 6.7 (6.0)                               | 4.5 (5.5)                       |
| Sex                                    |                                       |                                         |                                 |
| Female                                 | 863 (56.8)                            | 979 (56.2)                              | 52 (54.7)                       |
| Male                                   | 657 (43.2)                            | 762 (43.8)                              | 43 (45.3)                       |
| Clinician type                         |                                       |                                         |                                 |
| Attending physician                    | 728 (47.9)                            | 844 (48.5)                              | 48 (50.5)                       |
| House staff                            | 485 (31.9)                            | 562 (32.3)                              | 24 (25.3)                       |
| Mid-level <sup>e</sup>                 | 307 (20.2)                            | 335 (19.2)                              | 23 (24.2)                       |
| Primary practice area                  |                                       |                                         |                                 |
| Outpatient                             | 764 (50.3)                            | 895 (51.4)                              | 52 (54.7)                       |
| Inpatient                              |                                       |                                         |                                 |
| Medical/surgical                       | 327 (21.5)                            | 310 (17.8)                              | 10 (10.5)                       |
| Pediatrics                             | 59 (3.9)                              | 63 (3.6)                                | 0 (0)                           |
| Obstetrics                             | 25 (1.6)                              | 39 (2.2)                                | 3 (3.2)                         |
| Critical care                          | 25 (1.6)                              | 20 (1.1)                                | 1 (1.1)                         |
| Other                                  | 105 (6.9)                             | 107 (6.1)                               | 9 (9.5)                         |
| Emergency department                   | 126 (8.3)                             | 149 (8.6)                               | 11 (11.6)                       |
| Unclassified                           | 89 (5.9)                              | 158 (9.1)                               | 9 (9.5)                         |

<sup>a</sup> In as-treated analysis, each order was characterized according to the clinician's configuration at the time the order was placed.

<sup>b</sup> Restricted, configuration limited to one record open at a time.

<sup>c</sup> Unrestricted, configuration allowed up to four records open concurrently.

<sup>d</sup> These clinicians switched between arms at least once during the course of the trial period.

<sup>e</sup> Mid-level clinicians include nurse practitioners and physician assistants.



**eTable 4. Wrong-Patient Orders in the Restricted vs Unrestricted Group (As-Treated Analysis)<sup>a</sup>**

|                                  | No. of Orders           |                           |
|----------------------------------|-------------------------|---------------------------|
|                                  | Restricted <sup>b</sup> | Unrestricted <sup>c</sup> |
| <b>Overall</b>                   |                         |                           |
| Wrong-patient orders per 100,000 | <b>52.1</b>             | <b>48.2</b>               |
| Wrong-patient orders             | 2982                    | 3091                      |
| Total orders                     | 5,724,389               | 6,415,909                 |
| <b>Emergency department</b>      |                         |                           |
| Wrong-patient orders per 100,000 | <b>90.7</b>             | <b>84.1</b>               |
| Wrong-patient orders             | 966                     | 992                       |
| Total orders                     | 1,064,611               | 1,179,331                 |
| <b>Inpatient</b>                 |                         |                           |
| Wrong-patient orders per 100,000 | <b>88.2</b>             | <b>88.1</b>               |
| Wrong-patient orders             | 1884                    | 1952                      |
| Total orders                     | 2,137,109               | 2,215,960                 |
| <b>Medical/Surgical</b>          |                         |                           |
| Wrong-patient orders per 100,000 | <b>93.7</b>             | <b>85.3</b>               |
| Wrong-patient orders             | 1408                    | 1207                      |
| Total orders                     | 1,502,711               | 1,414,369                 |
| <b>Critical care</b>             |                         |                           |
| Wrong-patient orders per 100,000 | <b>99.2</b>             | <b>134.3</b>              |
| Wrong-patient orders             | 181                     | 335                       |
| Total orders                     | 182,506                 | 249,444                   |
| <b>Pediatrics</b>                |                         |                           |
| Wrong-patient orders per 100,000 | <b>45.8</b>             | <b>66.9</b>               |
| Wrong-patient orders             | 92                      | 147                       |
| Total orders                     | 200,712                 | 219,779                   |
| <b>Obstetrics</b>                |                         |                           |
| Wrong-patient orders per 100,000 | <b>106.0</b>            | <b>111.2</b>              |
| Wrong-patient orders             | 121                     | 171                       |
| Total orders                     | 153,767                 | 114,184                   |
| <b>Outpatient</b>                |                         |                           |
| Wrong-patient orders per 100,000 | <b>4.8</b>              | <b>4.5</b>                |
| Wrong-patient orders             | 118                     | 129                       |
| Total orders                     | 2,435,340               | 2,878,776                 |

<sup>a</sup> Wrong-patient orders were analyzed using the order as the unit of analysis. In as-treated analysis, each order was characterized according to the clinician's configuration at the time the order was placed.

<sup>b</sup> Restricted, configuration limited to one record open at a time.

<sup>c</sup> Unrestricted, configuration allowed up to four records open concurrently.

**eTable 5. Utilization and Wrong-Patient Orders by Number of Records Open in the Unrestricted Group<sup>a</sup>**

|            | Open Records | No. of Orders | Percent of Orders Placed <sup>b</sup> | Wrong-Patient Orders per 100,000 orders |        |       |                      |
|------------|--------------|---------------|---------------------------------------|-----------------------------------------|--------|-------|----------------------|
|            |              |               |                                       | Rate                                    | 95% CI |       | P value <sup>c</sup> |
|            |              |               |                                       |                                         | Lower  | Upper |                      |
| Overall    | 1            | 4,173,579     | 66.4%                                 | 29.2                                    | 27.6   | 30.9  | <.001                |
|            | 2            | 844,319       | 13.4%                                 | 68.3                                    | 62.9   | 74.1  |                      |
|            | 3            | 481,014       | 7.7%                                  | 86.1                                    | 78.0   | 94.8  |                      |
|            | 4            | 784,290       | 12.5%                                 | 102.5                                   | 95.5   | 109.8 |                      |
| ED         | 1            | 429,671       | 37.8%                                 | 65.6                                    | 58.2   | 73.8  | <.001                |
|            | 2            | 188,194       | 16.5%                                 | 93.5                                    | 80.2   | 108.4 |                      |
|            | 3            | 151,431       | 13.3%                                 | 111.6                                   | 95.4   | 129.7 |                      |
|            | 4            | 368,478       | 32.4%                                 | 95.3                                    | 85.6   | 105.8 |                      |
| Inpatient  | 1            | 1,270,318     | 58.1%                                 | 65.2                                    | 60.8   | 69.8  | <.001                |
|            | 2            | 354,371       | 16.2%                                 | 106.1                                   | 95.7   | 117.4 |                      |
|            | 3            | 220,851       | 10.1%                                 | 108.7                                   | 95.4   | 123.3 |                      |
|            | 4            | 340,765       | 15.6%                                 | 132.6                                   | 120.7  | 145.4 |                      |
| Outpatient | 1            | 2,389,203     | 84.7%                                 | 4.2                                     | 3.4    | 5.1   | .02                  |
|            | 2            | 282,354       | 10.0%                                 | 8.1                                     | 5.2    | 12.2  |                      |
|            | 3            | 95,200        | 3.4%                                  | 4.2                                     | 1.1    | 10.8  |                      |
|            | 4            | 54,177        | 1.9%                                  | 1.8                                     | 0.0    | 10.3  |                      |

<sup>a</sup> Unrestricted, configuration allowed up to 4 records open concurrently.

<sup>b</sup> Percentage of orders placed with 1, 2, 3, or 4 records open, overall and stratified by clinical setting.

<sup>c</sup> Calculated using chi-square test.

## eReferences

1. Abraham J, Kannampallil TG, Jarman A, et al. Reasons for computerised provider order entry (CPOE)-based inpatient medication ordering errors: an observational study of voided orders. *BMJ Qual Saf*. 2018;27(4):299-307.
2. National Quality Forum. Patient Safety 2015: Draft Report for Comment. 2015. [http://www.qualityforum.org/Projects/n-r/Patient\\_Safety\\_Measures\\_2015/Draft\\_Report\\_for\\_Comment.aspx](http://www.qualityforum.org/Projects/n-r/Patient_Safety_Measures_2015/Draft_Report_for_Comment.aspx). Accessed February 24, 2017.
3. National Quality Forum. Patient Safety 2015: Final Technical Report. 2016. <http://www.qualityforum.org/WorkArea/linkit.aspx?LinkIdentifier=id&ItemID=81724>. Accessed July 27, 2018.
4. Adelman JS, Kalkut GE, Schechter CB, et al. Understanding and preventing wrong-patient electronic orders: a randomized controlled trial. *J Am Med Inform Assoc*. 2013;20(2):305-310.
5. Sharek PJ, Horbar JD, Mason W, et al. Adverse events in the neonatal intensive care unit: development, testing, and findings of an NICU-focused trigger tool to identify harm in North American NICUs. *Pediatrics*. 2006;118(4):1332-1340.
6. Levinson DR. Adverse Events in Hospitals: Methods for Identifying Events. 2010. <https://oig.hhs.gov/oei/reports/oei-06-08-00221.pdf>. Accessed May 30, 2017.
7. Classen DC, Resar R, Griffin F, et al. 'Global trigger tool' shows that adverse events in hospitals may be ten times greater than previously measured. *Health Aff (Millwood)*. 2011;30(4):581-589.
8. Adelman J, Aschner J, Schechter C, et al. Use of temporary names for newborns and associated risks. *Pediatrics*. 2015;136(2):327-333.
9. Adelman JS, Aschner JL, Schechter CB, et al. Evaluating serial strategies for preventing wrong-patient orders in the NICU. *Pediatrics*. 2017;139(5):e20162863.
10. Green RA, Hripcsak G, Salmasian H, et al. Intercepting wrong-patient orders in a computerized provider order entry system. *Ann Emerg Med*. 2015;65(6):679-686.
11. Lombardi D, Gaston-Kim J, Perlstein D, et al. Preventing wrong-patient electronic orders in the emergency department. *J Clin Outcomes Manage*. 2016;23(12):550-554.
12. Kannampallil TG, Manning JD, Chestek DW, et al. Effect of number of open charts on intercepted wrong-patient medication orders in an emergency department. *J Am Med Inform Assoc*. 2017;25(6):739-743.
13. U.S. Department of Veterans Affairs. Veterans Health Administration National Patient Safety Improvement Handbook. 2011. [http://www.va.gov/vhapublications/ViewPublication.asp?pub\\_ID=2389](http://www.va.gov/vhapublications/ViewPublication.asp?pub_ID=2389) Accessed February 24, 2017.
14. National Association for Healthcare Quality. National Association for Healthcare Quality (NAHQ) Issues 'Call to Action' for Enhancing Health Care Quality and Patient Safety. 2012. <http://www.prnewswire.com/news-releases/national-association-for-healthcare-quality-nahq-issues-call-to-action-for-enhancing-health-care-quality-and-patient-safety-174423331.html>. Accessed February 24, 2017.
15. Reason J. Human error: models and management. *West J Med*. 2000;172(6):393-396.
16. Aspden P, Corrigan JM, Wolcott J, Erickson SM, eds. *Patient Safety: Achieving a New Standard for Care*. Washington (DC): National Academies Press (US); 2004.

17. Cusack CM, Poon EG. Health Information Exchange Evaluation Toolkit. Prepared for the AHRQ National Resource Center for Health Information Technology under contract No. 290-04-0016. *AHRQ Publication No 08-0026-EF Rockville, MD: Agency for Healthcare Research and Quality November 2007.*
18. Agency for Healthcare Research and Quality. Common Formats. <https://psa.ahrq.gov/common>. Accessed July 5, 2018.
19. Quality Interagency Coordination Task Force. Doing What Counts for Patient Safety: Federal Actions to Reduce Medical Errors and their Impact. 2000. <https://archive.ahrq.gov/quic/Report/errors6.pdf>. Accessed July 27, 2018.
20. Leape L, Abookire S. WHO Draft Guidelines for Adverse Event Reporting and Learning Systems: From Information to Action. 2005. <http://apps.who.int/iris/bitstream/handle/10665/69797/WHO-EIP-SPO-QPS-05.3-eng.pdf?sequence=1&isAllowed=y>. Accessed July 27, 2018.
21. Institute for Healthcare Improvement. Create a Reporting System. 2017. <http://www.ihl.org/resources/Pages/Changes/CreateaReportingSystem.aspx>. Accessed July 27, 2018.
22. Wu AW, ed *The Value of Close Calls in Improving Patient Safety: Learning How to Avoid and Mitigate Patient Harm*. Oakbrook Terrace, IL: Joint Commission Resources; 2011.
