# Supplementary material
Source: PubMed Central journal article supplement (PMC6518341)
Supplement: jama-321-1780-s003.pdf [file jama-321-1780-s003.pdf]

## Data Sharing Statement

Adelman. Effect of Restriction of the Number of Concurrently Open Records in an Electronic Health Record on Wrong-Patient Order Errors. *JAMA*. Published May 14, 2019. 10.1001/jama.2019.3698

### Data

**Data available:** Yes

**Data types:** Other (please specify)

**Additional Information:** Partial de-identified data.

**How to access data:** Jason Adelman, MD, MS

[jsa2163@cumc.columbia.edu](mailto:jsa2163@cumc.columbia.edu)

**When available:** With publication

### Supporting Documents

**Document types:** None

### Additional Information

**Who can access the data:** Researchers whose proposed use of the data has been approved by their Institutional Review Board.

**Types of analyses:** Data will be made available for a specified research purpose.

**Mechanisms of data availability:** Data will be made available upon approval of a proposal.
